# Supplementary material for: Virus Reduction Neutralization Test: A Single-Cell Imaging High-Throughput Virus Neutralization Assay for Dengue
Source: PubMed Central journal article supplement (PMC6283513; doi:10.4269/ajtmh.17-0948), 2018-10-22
Supplement: tpmd170948.SD1.pdf [file tpmd170948.SD1.pdf]

Supplementary Figure 1. DEN2 assay positive control tracking. Dotted lines represent the mean VRNT<sub>50</sub> (middle line) and  $\pm$  two standard deviations about the mean (upper and lower lines).

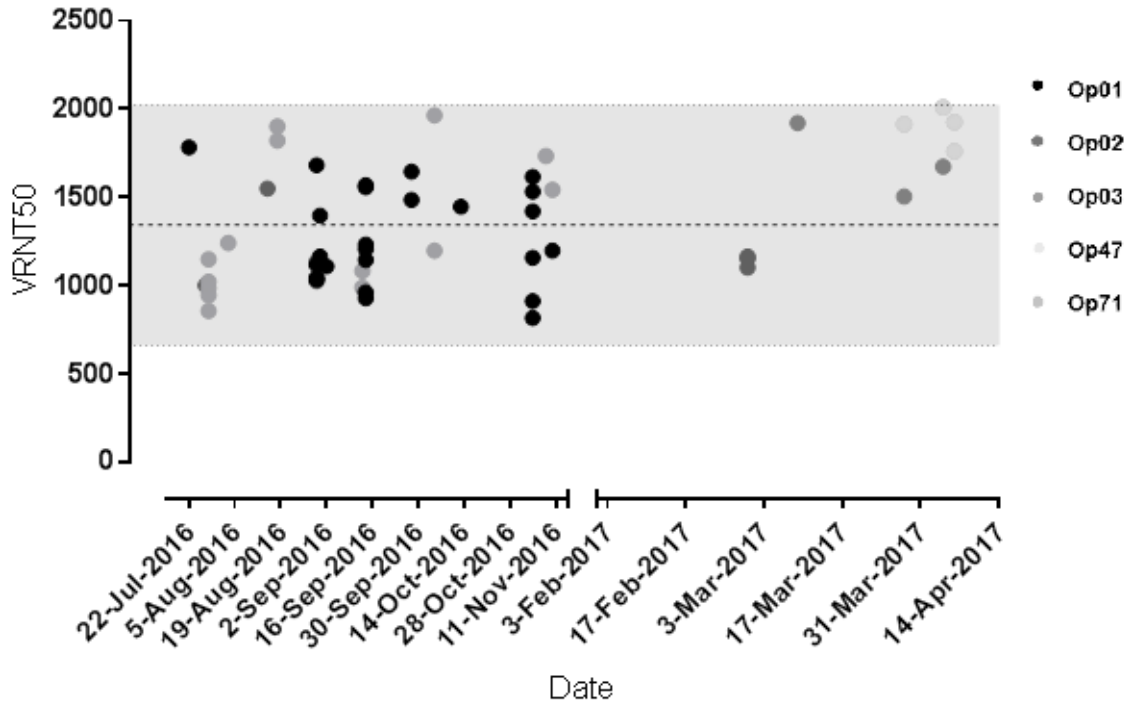

Supplementary Table 1. FRNT50 titers and corresponding titer fold-change from Day 1 titers.

|     | FRNT50 titer |      |      |      |
|-----|--------------|------|------|------|
| Day | DEN1         | DEN2 | DEN3 | DEN4 |
| 1   | 247          | 1264 | 617  | 148  |
| 2   | 64           | 417  | 730  | 90   |
| 3   | 69           | 235  | 255  | 68   |
| 4   | 164          | 38   | 192  | 18   |

|     | Titer Fold-change |      |      |      |
|-----|-------------------|------|------|------|
| Day | DEN1              | DEN2 | DEN3 | DEN4 |
| 1   | n/a               | n/a  | n/a  | n/a  |
| 2   | 3.9               | 3    | 1.2  | 1.7  |
| 3   | 3.6               | 5.4  | 2.4  | 2.2  |
| 4   | 1.5               | 33.3 | 3.2  | 8.2  |

Supplementary Table 2 FRNT<sub>50</sub> and VRNT<sub>50</sub> correlation titers for DEN1-4

| Sample | DEN1               |                    | DEN2               |                    | DEN3               |                    | DEN4               |                    |
|--------|--------------------|--------------------|--------------------|--------------------|--------------------|--------------------|--------------------|--------------------|
|        | VRNT <sub>50</sub> | FRNT <sub>50</sub> | VRNT <sub>50</sub> | FRNT <sub>50</sub> | VRNT <sub>50</sub> | FRNT <sub>50</sub> | VRNT <sub>50</sub> | FRNT <sub>50</sub> |
| 1      | <10                | <10                | <10                | <10                | <10                | <10                | <10                | <10                |
| 2      | <10                | <10                | <10                | <10                | 28                 | <10                | <10                | <10                |
| 3      | <10                | <10                | <10                | <10                | <10                | <10                | <10                | <10                |
| 4      | <10                | <10                | 16                 | 26                 | <10                | <10                | <10                | <10                |
| 5      | 10                 | <10                | <10                | <10                | 73                 | 37                 | <10                | <10                |
| 6      | <10                | <10                | <10                | <10                | <10                | <10                | <10                | <10                |
| 7      | <10                | <10                | <10                | <10                | <10                | <10                | <10                | <10                |
| 8      | <10                | <10                | <10                | <10                | <10                | <10                | <10                | <10                |
| 9      | 21                 | 14                 | 11                 | <10                | 91                 | 68                 | <10                | <10                |
| 10     | 226                | 123                | 109                | 326                | 380                | 679                | 53                 | <10                |
| 11     | 312                | 285                | 105                | 106                | 282                | 714                | 156                | 55                 |
| 12     | <10                | <10                | <10                | <10                | <10                | <10                | <10                | <10                |
| 13     | <10                | <10                | <10                | <10                | <10                | <10                | <10                | <10                |
| 14     | 25                 | <10                | 12                 | <10                | 73                 | 39                 | <10                | <10                |
| 15     | 151                | 131                | 99                 | 141                | 697                | 1309               | 92                 | 17                 |
| 16     | 484                | 689                | 255                | 235                | 1101               | 2007               | 541                | 153                |
| 17     | 530                | 176                | 225                | 606                | 492                | 1549               | 530                | 91                 |
| 18     | <10                | <10                | <10                | <10                | 29                 | <10                | <10                | <10                |
| 19     | 228                | 193                | 153                | 282                | 637                | 4192               | 112                | 164                |
| 20     | 105                | 71                 | 43                 | 70                 | 293                | 412                | 69                 | 17                 |
| 21     | 850                | 459                | 240                | 342                | 660                | 2860               | 850                | 69                 |
| 22     | 325                | 64                 | 88                 | 181                | 487                | 406                | 184                | 28                 |
| 23     | <10                | <10                | <10                | <10                | <10                | <10                | <10                | <10                |
| 24     | <10                | <10                | <10                | <10                | <10                | <10                | <10                | <10                |
| 25     | 501                | 370                | 265                | 580                | 1492               | 1557               | 975                | 260                |
| 26     | 424                | 154                | 899                | 824                | 611                | 1045               | 769                | 291                |
| 27     | <10                | <10                | 11                 | <10                | <10                | <10                | <10                | <10                |
| 28     | 400                | 311                | 639                | 833                | 1028               | 1168               | 378                | 79                 |
| 29     | <10                | <10                | <10                | <10                | <10                | <10                | <10                | <10                |
| 30     | <10                | <10                | <10                | <10                | <10                | <10                | <10                | <10                |
| 31     | 51                 | <10                | 34                 | 40                 | 316                | 464                | <10                | <10                |
| 32     | <10                | <10                | <10                | <10                | <10                | <10                | <10                | <10                |
| 33     | <10                | <10                | <10                | <10                | <10                | <10                | <10                | <10                |
| 34     | <10                | <10                | <10                | <10                | <10                | <10                | <10                | <10                |
| 35     | 969                | 495                | 713                | 447                | >5120              | 4368               | 291                | 52                 |
| 36     | <10                | <10                | <10                | <10                | <10                | <10                | <10                | <10                |
| 37     | <10                | <10                | <10                | <10                | <10                | <10                | <10                | <10                |
| 38     | <10                | <10                | <10                | <10                | <10                | <10                | <10                | <10                |
| 39     | 1479               | 259                | 1379               | 825                | 3062               | 4324               | 541                | 101                |
| 40     | <10                | <10                | <10                | <10                | <10                | <10                | <10                | <10                |
| 41     | 95                 | 13                 | 24                 | 68                 | <10                | 45                 | 31                 | 23                 |
| 42     | <10                | <10                | <10                | <10                | <10                | <10                | <10                | <10                |
| 43     | <10                | <10                | <10                | <10                | <10                | <10                | <10                | <10                |
| 44     | <10                | <10                | <10                | <10                | <10                | <10                | <10                | <10                |
| 45     | <10                | <10                | <10                | <10                | <10                | <10                | <10                | <10                |
| 46     | <10                | <10                | <10                | <10                | <10                | <10                | <10                | <10                |
| 47     | <10                | <10                | <10                | <10                | <10                | <10                | <10                | <10                |
| 48     | 17                 | <10                | 12                 | <10                | 38                 | 16                 | <10                | <10                |
| 49     | <10                | <10                | <10                | <10                | <10                | <10                | <10                | <10                |
| 50     | <10                | <10                | <10                | <10                | <10                | <10                | <10                | <10                |
| 51     | 16                 | <10                | <10                | <10                | 21                 | <10                | <10                | <10                |
| 52     | <10                | <10                | <10                | <10                | 26                 | <10                | <10                | <10                |
| 53     | 64                 | 33                 | 22                 | 20                 | 63                 | 46                 | 29                 | <10                |
| 54     | 34                 | <10                | 29                 | 22                 | 31                 | 29                 | 18                 | <10                |
| 55     | <10                | <10                | <10                | <10                | <10                | <10                | <10                | <10                |
| 56     | 117                | 50                 | 164                | 379                | 584                | 277                | 76                 | 26                 |
| 57     | 61                 | 49                 | 46                 | 58                 | 162                | 87                 | 26                 | <10                |
| 58     | <10                | 41                 | 34                 | 35                 | 142                | 96                 | 37                 | 23                 |
| 59     | <10                | <10                | <10                | <10                | 12                 | <10                | <10                | <10                |
| 60     | 292                | 88                 | 784                | 1488               | 822                | 638                | 288                | 55                 |
| 61     | <10                | <10                | <10                | <10                | <10                | <10                | <10                | <10                |
| 62     | <10                | 44                 | 17                 | 10                 | 237                | 43                 | 167                | 45                 |
| 63     | 33                 | 20                 | 190                | 187                | 29                 | 28                 | 17                 | 10                 |
| 64     | <10                | 64                 | 64                 | 48                 | 268                | 135                | 70                 | 36                 |
| 65     | 50                 | <10                | <10                | <10                | <10                | <10                | <10                | <10                |
| 66     | <10                | <10                | <10                | <10                | 89                 | 52                 | <10                | <10                |
| 67     | 379                | 333                | 188                | 413                | 1017               | 1515               | 66                 | 54                 |
| 68     | 168                | 57                 | 53                 | 52                 | 460                | 337                | 41                 | <10                |
| 69     | 163                | <10                | <10                | <10                | 18                 | <10                | <10                | <10                |
| 70     | <10                | <10                | <10                | <10                | <10                | <10                | <10                | <10                |
| 71     | <10                | <10                | <10                | <10                | <10                | <10                | <10                | <10                |
| 72     | 551                | 290                | 204                | 418                | 1464               | 5214               | 483                | 136                |
| 73     | 17                 | <10                | 11                 | <10                | 52                 | <10                | <10                | <10                |
| 74     | <10                | <10                | <10                | <10                | <10                | <10                | <10                | <10                |
| 75     | 45                 | 39                 | 297                | 252                | 102                | 159                | 15                 | <10                |
| 76     | 36                 | 41                 | 31                 | 37                 | 321                | 525                | 64                 | 15                 |
| 77     | <10                | <10                | <10                | <10                | <10                | <10                | <10                | <10                |
| 78     | 20                 | 25                 | 19                 | 14                 | 89                 | 109                | 13                 | <10                |
| 79     | 1015               | 172                | 223                | 409                | 1272               | 906                | 190                | 143                |
| 80     | 150                | 75                 | 225                | 391                | 570                | 663                | 285                | 190                |
| 81     | 59                 | 49                 | 128                | 65                 | 129                | 96                 | 68                 | <10                |
